# Supplementary material for: Recycling of spent coffee grounds for useful extracts and green composites
Source: Royal Society of Chemistry journal article supplement (doi:10.1039/d0ra09379c), 2021-01-01

## **Recycling of spent coffee grounds for useful extracts and green composites**

Yihao Leow, Pek Yin Yew Michelle, Pei Lin Chee, Xian Jun Loh, Dan Kai

Number of Pages: 5

Number of Figures: 3

Number of Tables: 3

Fig. S1: Chemical composition of (a) H-CO, (B) T-CO and (c) E-CO

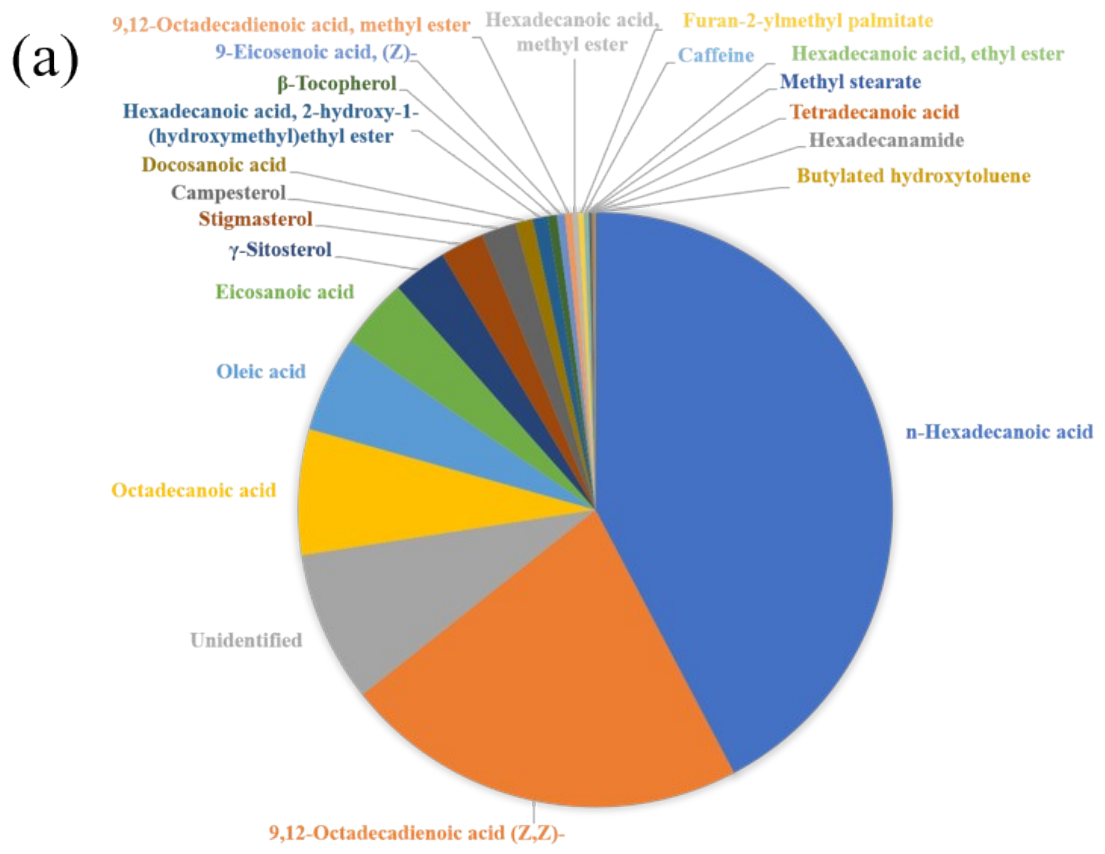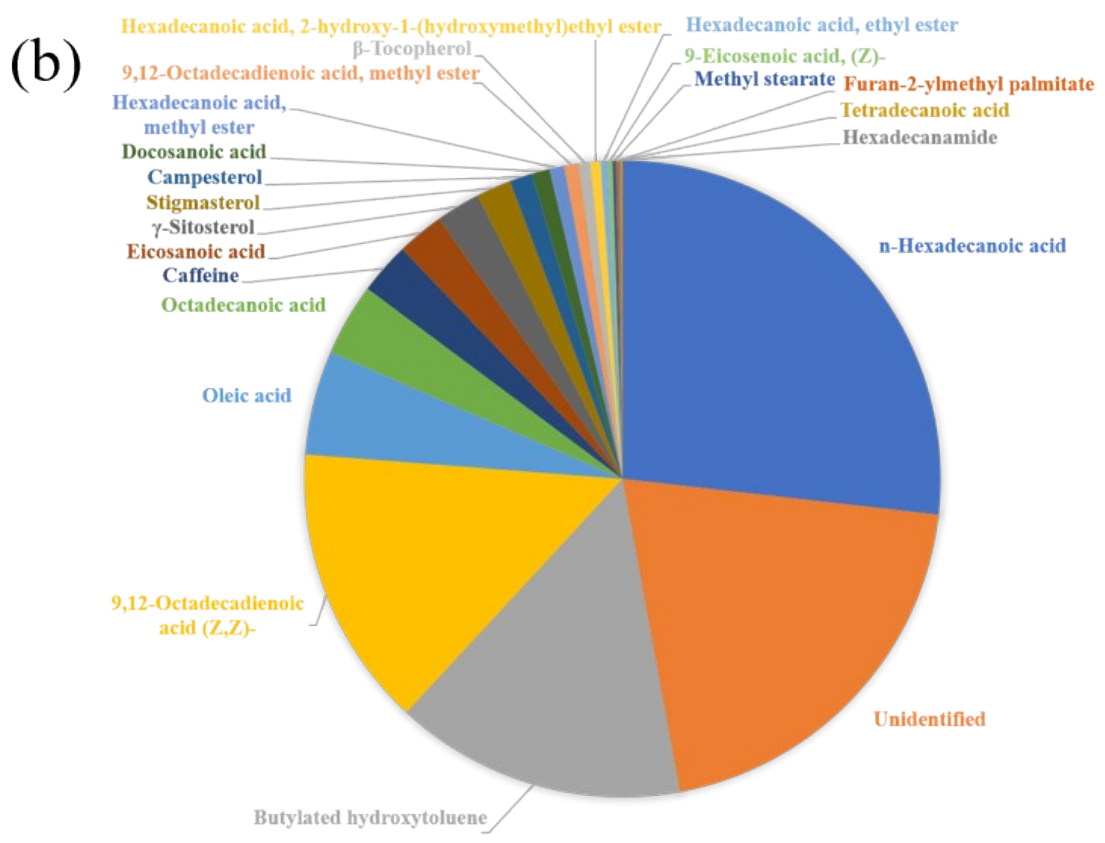

(c)

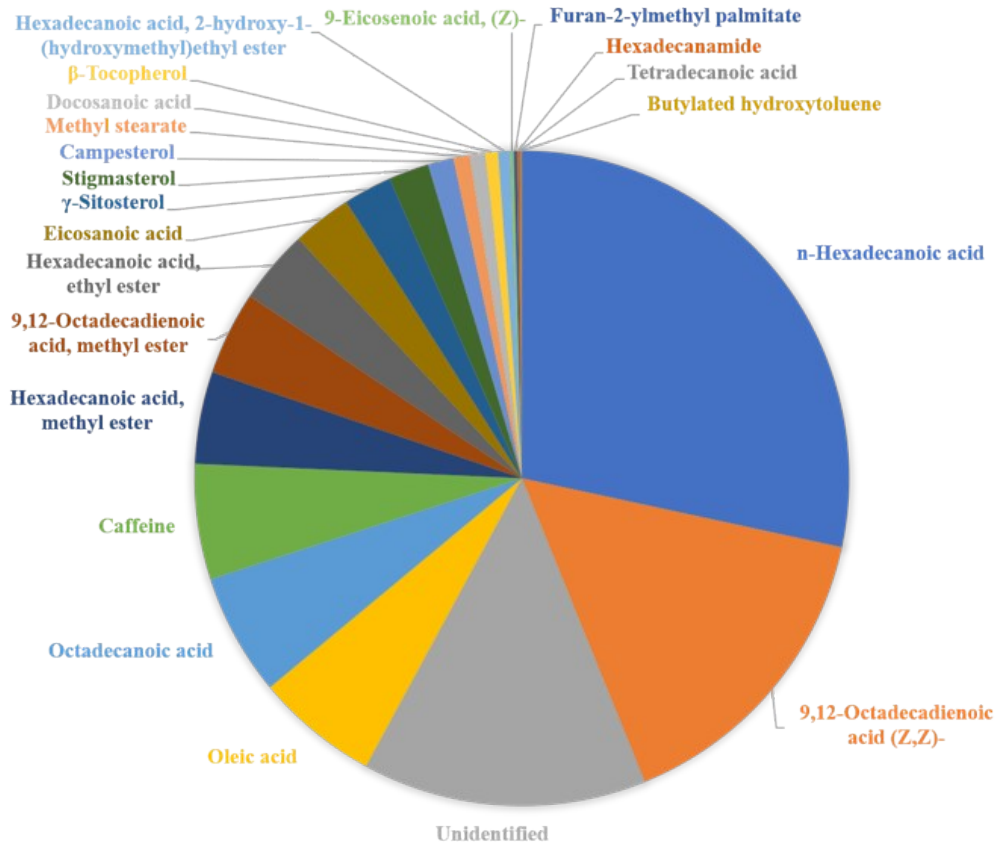

Table S1: Chemical composition of H-CO, T-CO, A-CO and E-CO

| Chemical Compound                                         | Coffee Oil Samples |             |             |             |
|-----------------------------------------------------------|--------------------|-------------|-------------|-------------|
|                                                           | H-CO<br>(%)        | T-CO<br>(%) | A-CO<br>(%) | E-CO<br>(%) |
| Caffeine                                                  | 0.15               | 2.63        | 6.37        | 5.70        |
| Butylated Hydroxytoluene                                  | 0.06               | 14.79       | 0.33        | 0.02        |
| Tetradecanoic acid                                        | 0.09               | 0.06        | 0.08        | 0.06        |
| Hexadecanamide                                            | 0.08               | 0.10        | 0.08        | 0.14        |
| n-Hexadecanoic acid                                       | 42.28              | 26.80       | 37.39       | 28.38       |
| Hexadecanoic acid, methyl ester                           | 0.33               | 0.75        | 0.19        | 4.55        |
| 9,12-Octadecadienoic acid (Z,Z)-                          | 22.05              | 14.33       | 19.27       | 15.49       |
| Oleic Acid                                                | 5.22               | 5.29        | 5.01        | 6.07        |
| Octadecanoic acid                                         | 6.83               | 3.68        | 6.30        | 6.03        |
| Hexadecanoic acid, ethyl ester                            | 0.13               | 0.35        | 0.06        | 3.65        |
| 9,12-Octadecadienoic acid, methyl ester                   | 0.39               | 0.73        | 0.24        | 4.14        |
| Methyl stearate                                           | 0.11               | 0.19        | 0.13        | 0.80        |
| 9-Eicosenoic acid, (Z)-                                   | 0.44               | 0.24        | 0.20        | 0.17        |
| Eicosanoic acid                                           | 3.85               | 2.39        | 3.49        | 2.94        |
| Hexadecanoic acid, 2-hydroxy-1-(hydroxymethyl)ethyl ester | 0.81               | 0.53        | 0.54        | 0.59        |
| Furan-2-ylmethyl palmitate                                | 0.31               | 0.16        | 0.22        | 0.17        |
| Docosanoic acid                                           | 0.94               | 0.91        | 1.51        | 0.77        |
| Campesterol                                               | 1.90               | 1.16        | 1.58        | 1.26        |
| Stigmasterol                                              | 2.38               | 1.77        | 2.38        | 1.99        |
| $\gamma$ -Sitosterol                                      | 2.95               | 2.24        | 3.06        | 2.39        |
| $\beta$ -Tocopherol                                       | 0.50               | 0.59        | 0.88        | 0.63        |
| Unidentified                                              | 8.23               | 20.31       | 10.69       | 14.03       |

Fig. S2: Surface morphology SEM images of 50 wt% SCG loading in epoxy composite

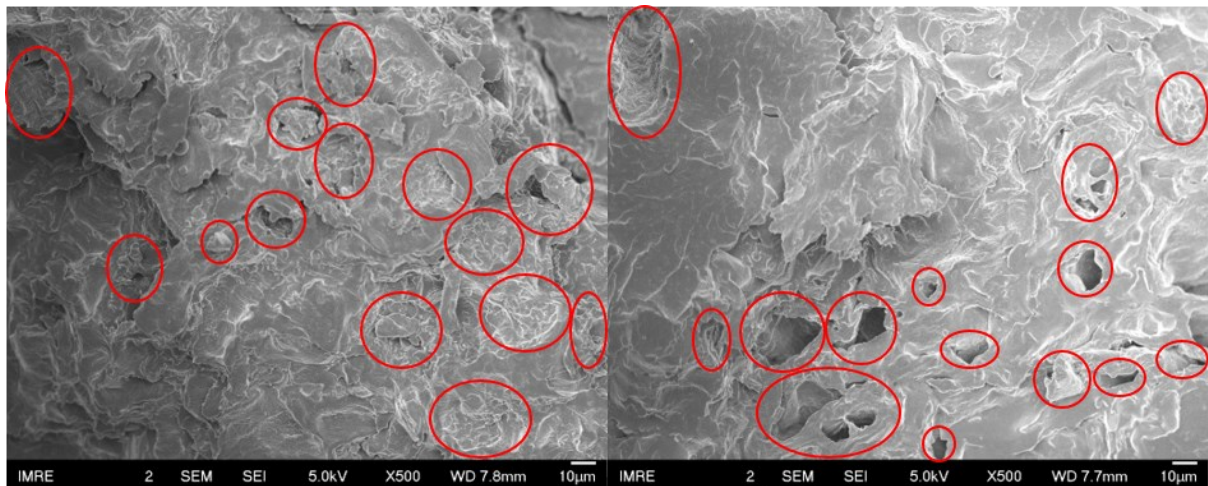

Table S2: Tensile and flexural properties of 50 wt% SCG loading in epoxy composite

| Sample    | Density<br>(kg/m <sup>3</sup> ) | Tensile Properties       |                            |                        | Flexural Properties      |                            |                        |
|-----------|---------------------------------|--------------------------|----------------------------|------------------------|--------------------------|----------------------------|------------------------|
|           |                                 | Young's Modulus<br>(GPa) | Stress at Maximum<br>(MPa) | Strain at Break<br>(%) | Young's Modulus<br>(GPa) | Stress at Maximum<br>(MPa) | Strain at Break<br>(%) |
| SCG-Epoxy | -                               | 2.81 ± 0.12              | 13.9 ± 3.4                 | 0.8 ± 0.2              | 1.90 ± 0.19              | 28.2 ± 4.1                 | 1.8 ± 0.2              |

Table S3: Thermal and degradation properties of Epoxy, SCG and ESCG composites

| Sample       | Temperature at 95 wt%<br>(°C) | Residue<br>(wt%) | Peak 1<br>(°C) | Peak 2<br>(°C) |
|--------------|-------------------------------|------------------|----------------|----------------|
| Epoxy        | 335                           | 8.5              | 354            | 379            |
| SCG-Epoxy    | 273                           | 16.5             | 345            | 376            |
| H-ESCG-Epoxy | 276                           | 16.8             | 342            | 371            |
| T-ESCG-Epoxy | 276                           | 18.6             | 341            | 374            |
| A-ESCG-Epoxy | 265                           | 16.5             | 348            | 375            |
| E-ESCG-Epoxy | 262                           | 16.2             | 342            | 374            |

Fig. S3: Images of SCG/ESCG-Epoxy composites

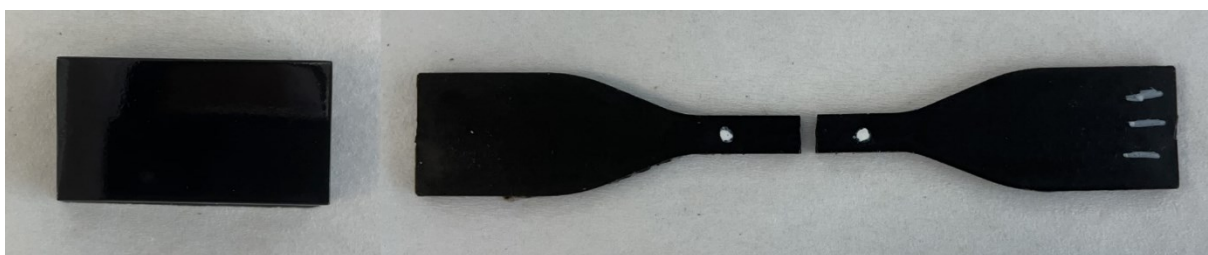

Supplement: d0ra09379c1.pdf [file d0ra09379c1.pdf]
